# Supplementary material
Source: PubMed Central journal article supplement (PMC6312028)
Supplement: 2018_194951-Disclosures_and_Contributions.pdf [file 2018_194951-Disclosures_and_Contributions.pdf]

Haematologica  
HAEMATOL/2018/194951  
Version 4

Incidence of upper-extremity deep vein thrombosis in Western France:  
a community based study

Aurélien Delluc, Rapahël Le Mao, Cécile Tromeur, Nathalie Chambry,  
Hélène Rault-Nagel, Luc Bressollette, Dominique Mottier, Francis  
Couturaud, and Karine Lacut

Disclosures: There are no competing interests

Contributions: AD, DM, FC, and KL performed the research, analysed data, performed data analysis and wrote the manuscript. RLM, CT, NC, HRN, and LB performed the research, interpreted the data, and provided critical review of the manuscript.
